1  
2  
3  
4  
5  
6  
7  
8  
9  
10  
11  
12  
13  
14  
15  
16  
17  
18  
19  
20

**Intact synapse structure and function after combined knockout of PTP $\delta$ , PTP $\sigma$  and LAR**

Javier Emperador-Melero<sup>#</sup>, Giovanni de Nola, and Pascal S. Kaeser<sup>#</sup>

Department of Neurobiology, Harvard Medical School, Boston, MA 02115

<sup>#</sup>correspondence should be addressed to JEM (Javier\_EmperadorMelero@hms.harvard.edu) or  
PSK (kaeser@hms.harvard.edu)

21 **Abstract**

22 It has long been proposed that Leukocyte common Antigen-Related Receptor Protein Tyrosine  
23 Phosphatases (LAR-RPTPs) are cell-adhesion proteins for the control of synapse assembly.  
24 Their synaptic nanoscale localization, however, has not been established, and the fine structure  
25 of synapses after knockout of the three vertebrate genes for LAR-RPTPs (PTP $\delta$ , PTP $\sigma$  and  
26 LAR) has not been tested. Here, we find that PTP $\delta$  is precisely apposed to postsynaptic  
27 scaffolds at excitatory and inhibitory synapses using superresolution microscopy. We generated  
28 triple-conditional knockout mice for PTP $\delta$ , PTP $\sigma$  and LAR to test whether they are essential for  
29 synapse structure. While mild effects on synaptic vesicle clustering and active zone architecture  
30 were detected, synapse numbers and their overall structure were unaffected, membrane  
31 anchoring of the active zone persisted, and vesicle docking and release were normal. We  
32 conclude that LAR-RPTPs, despite their localization at synaptic appositions, are dispensable for  
33 the organization and function of presynaptic nerve terminals.

34

## 35 **Introduction**

36 Presynaptic nerve terminals are packed with neurotransmitter-laden vesicles that fuse at the  
37 active zone, membrane-attached protein machinery that forms vesicular release sites. Work  
38 over the past two decades has established that the unique synaptic architecture with nanoscale  
39 apposition of these secretory hotspots with receptors on postsynaptic cells allows for robust  
40 signal transmission (Biederer et al., 2017; Südhof, 2012). The assembly mechanisms of these  
41 transcellular molecular machines, however, remain largely obscure (Emperador-Melero and  
42 Kaeser, 2020; Rizalar et al., 2021; Südhof, 2018).

43  
44 Leukocyte common Antigen-Related Receptor Protein Tyrosine Phosphatases (LAR-RPTPs)  
45 are transmembrane proteins often regarded as master presynaptic organizers. Three LAR-  
46 RPTPs, PTP $\delta$ , PTP $\sigma$  and LAR, are expressed in the brain, bind to the active zone organizer  
47 Liprin- $\alpha$  and to synaptic cell-adhesion proteins, and recruit presynaptic material in artificial  
48 synapse formation assays (Bomkamp et al., 2019; Han et al., 2018, 2020a; Johnson and Van  
49 Vactor, 2003; Kwon et al., 2010; Pulido et al., 1995; Serra-Pages et al., 1998; Takahashi et al.,  
50 2011; Yim et al., 2013). While these data suggest roles in presynaptic assembly (Fukai and  
51 Yoshida, 2020; Takahashi and Craig, 2013; Um and Ko, 2013), LAR-RPTP localization and  
52 function at neuronal synapses are less clear. In invertebrates, loss-of-function mutations in LAR-  
53 RPTPs resulted in defects in axon guidance, increased active zone and synapse areas, and  
54 impaired neurotransmitter secretion (Ackley et al., 2005; Clandinin et al., 2001; Desai et al.,  
55 1997; Kaufmann et al., 2002; Krueger et al., 1996). In mice, RNAi-mediated knockdown of LAR-  
56 RPTPs or deletion of PTP $\sigma$  caused generalized loss of synapse markers and defective synaptic  
57 transmission (Dunah et al., 2005; Han et al., 2018, 2020a, 2020b), leading to the model that  
58 LAR-RPTPs control synapse formation. Furthermore, mild synaptic and behavioral defects were  
59 observed in single gene constitutive knockouts (Elchebly et al., 1999; Horn et al., 2012; Park et  
60 al., 2020; Uetani et al., 2000; Wallace et al., 1999). Contrasting the RNAi-based analyses,

61 however, a recent study used conditional mouse gene targeting to ablate PTP $\delta$ , PTP $\sigma$  and LAR,  
62 and found no overt defects in neurotransmitter release (Sclip and Südhof, 2020), thereby  
63 questioning the general role of LAR-RPTPs in synapse assembly.

64

65 The lack of knowledge of LAR-RPTP nanoscale localization and of a characterization of  
66 vertebrate synapse structure after ablation of all LAR-RPTPs obscures our understanding of  
67 their roles as synapse organizers. Here, we establish that PTP $\delta$  is apposed to postsynaptic  
68 scaffolds of inhibitory and excitatory synapses using stimulated emission depletion (STED)  
69 microscopy, supporting that these proteins could control synapse formation or regulate synapse  
70 function. However, analyses of active zone protein composition, synapse ultrastructure, and  
71 synaptic transmission in newly generated conditional PTP $\delta$ /PTP $\sigma$ /LAR triple knockout mice  
72 reveal that these proteins are largely dispensable for synapse structure and function.

73

## 74 **Results**

75 PTP $\delta$ , PTP $\sigma$  and LAR are encoded by *Ptprd*, *Ptprs* and *Ptprf*, respectively. Conditional knockout  
76 mice for each gene were generated using homologous recombination (Fig. S1). Alleles for PTP $\delta$   
77 (Farhy-Tselnicker et al., 2017; Sclip and Südhof, 2020) and PTP $\sigma$  (Bunin et al., 2015; Sclip and  
78 Südhof, 2020) were identical to previously reported alleles, while the LAR allele was newly  
79 generated. The floxed alleles for each gene did not impair survival or RPTP protein expression  
80 (Fig. S1). We intercrossed these alleles to generate triple-conditional knockout mice. In cultured  
81 hippocampal neurons, Cre recombinase was delivered by lentiviruses and expressed from a  
82 Synapsin promoter (Liu et al., 2014), and resulted in removal of PTP $\delta$ , PTP $\sigma$  and LAR,  
83 generating cTKO<sup>RPTP</sup> neurons (Figs. 1A, 1B). Control<sup>RPTP</sup> neurons were obtained using an  
84 inactive version of Cre.

85

86 We first aimed at resolving the subsynaptic localization of LAR-RPTPs using STED microscopy.

87 PTP $\delta$  antibody specificity was established using cTKO<sup>RPTP</sup> neurons as controls, while antibodies  
88 suitable for superresolution analyses of PTP $\sigma$  or LAR could not be identified. To determine  
89 PTP $\delta$  localization, we selected side-view synapses with bar-like postsynaptic receptor scaffolds  
90 (PSD-95 and Gephyrin for excitatory and inhibitory synapses, respectively) on one side of a  
91 Synaptophysin-labeled nerve terminal (Fig. S2, (Emperador-Melero et al., 2020; Held et al.,  
92 2020; Wong et al., 2018)). PTP $\delta$ , detected with antibodies against the extracellular fibronectin  
93 domains (Shishikura et al., 2016), was concentrated apposed to PSD-95 and Gephyrin,  
94 respectively, at distances of  $24 \pm 17$  nm (PSD-95) and  $28 \pm 11$  nm (Gephyrin) (Figs. 1D-1I).  
95 Only background signal typical for quantification of raw images (Emperador-Melero et al., 2020;  
96 Held et al., 2020; Wang et al., 2016; Wong et al., 2018) remained in cTKO<sup>RPTP</sup> neurons in STED  
97 (Figs. 1D-1I) and confocal (Fig. S3) microscopy. This establishes that the extracellular portion of  
98 PTP $\delta$  localizes to the synaptic cleft. Given the presynaptic roles in invertebrate synapses and  
99 synapse formation assays (Ackley et al., 2005; Kaufmann et al., 2002), the interactions with the  
100 active zone protein Liprin- $\alpha$  (Pulido et al., 1995; Serra-Pages et al., 1998; Wong et al., 2018),  
101 and the asymmetry of the average STED side-view profile with a bias towards the presynapse  
102 (Figs. 1F, 1I), we conclude that most PTP $\delta$  is presynaptic and localized at the active zone, but  
103 postsynaptic components cannot be excluded. Furthermore, most synapses contain PTP $\delta$ , as  
104 88% of excitatory and 92% of inhibitory synapses had PTP $\delta$  peak intensities higher than three  
105 standard deviations above the average of the cTKO<sup>RPTP</sup> signal.

106  
107 The subsynaptic PTP $\delta$  localization and its presence at most synapses is consistent with general  
108 roles of LAR-RPTPs in synapse organization. However, the synapse density, measured as  
109 Synaptophysin puncta, was unchanged in cTKO<sup>RPTP</sup> neurons (Figs. 1L-1O), indicating that LAR-  
110 RPTPs are not necessary for synapse formation. Small increases in puncta intensity and area  
111 were detected (Figs. 1L-1O), consistent with enlargements observed in invertebrates (Ackley et  
112 al., 2005; Kaufmann et al., 2002). A recent independent study that ablated LAR-RPTPs early

113 also found normal synapse densities (Sclip and Südhof, 2020), contradicting the generalized  
114 model that LAR-RPTPs are master synapse organizers (Dunah et al., 2005; Fukai and Yoshida,  
115 2020; Han et al., 2018, 2020a, 2020b; Kwon et al., 2010; Takahashi and Craig, 2013; Um and  
116 Ko, 2013; Yim et al., 2013). It remains possible that LAR-RPTPs control assembly of a specific  
117 subset of synapses, which may explain why PTP $\delta$  ablation causes modest layer-specific  
118 impairments of synaptic strength (Park et al., 2020).

119

120 We next examined whether LAR-RPTPs have specific roles in presynaptic nanoscale structure.  
121 Electron microscopy of high-pressure frozen neurons (Figs. 2A-2E) revealed that synaptic  
122 vesicles were efficiently clustered at cTKO<sup>RPTP</sup> synapses. A ~15% increase in the total synaptic  
123 vesicle number per synapse profile was detected, matching the modestly increased  
124 Synaptophysin signals (Fig. 1) and the enhanced presence of vesicular markers in *C.elegans*  
125 mutants (Ackley et al., 2005). Notably, no differences in vesicle docking (defined by vesicles for  
126 which the electron dense membrane merges with the electron density of the target membrane)  
127 were observed. Synapse width, quantified as the width of the synaptic cleft, was increased by  
128 ~30%, again matching invertebrate phenotypes (Kaufmann et al., 2002). These data establish  
129 that LAR-RPTP ablation does not strongly impair synapse ultrastructure. LAR-RPTPs may  
130 shape aspects of the synaptic cleft, consistent with their localization and transsynaptic  
131 interactions and possibly similar to other synaptic cell adhesion proteins, for example SynCAMs  
132 (Perez de Arce et al., 2015).

133

134 We assessed whether active zone proteins, which are present at normal levels in Western blots  
135 after LAR-RPTP ablation (Sclip and Südhof, 2020), are anchored at the presynaptic membrane  
136 by LAR-RPTPs. STED microscopy was used to measure localization and peak levels of active  
137 zone proteins at excitatory (Figs. 2F-2I) and inhibitory (Figs. 2J-2M) synapses. RIM, Munc13-1,  
138 Ca<sub>v</sub>2.1 and Liprin- $\alpha$ 3 were localized within ~30-~60 nm of the postsynaptic scaffolds in

139 control<sup>RPTP</sup> and cTKO<sup>RPTP</sup> synapses, as expected for these proteins (Held et al., 2020; Wong et  
140 al., 2018). Overall, there were no strong changes in their levels, but small increases in RIM and  
141 small decreases in Liprin- $\alpha$ 3 were detected in both types of cTKO<sup>RPTP</sup> synapses either by STED  
142 (Figs. 2F-2M) or confocal (Fig. S4) microscopy. While binding between Liprin- $\alpha$  and LAR-RPTPs  
143 (Pulido et al., 1995; Serra-Pages et al., 1998) may explain Liprin- $\alpha$ 3 reductions, these data  
144 establish that other pathways are sufficient to recruit most Liprin- $\alpha$ 3 to active zones. The higher  
145 levels of RIM may be compensatory to reductions in Liprin- $\alpha$ 3, and could be related to the liquid-  
146 liquid phase separation properties of both proteins (Emperador-Melero et al., 2020; McDonald et  
147 al., 2020; Wu et al., 2019). Overall, we conclude that the active zone remains assembled and  
148 anchored to the target membrane in the absence of LAR-RPTPs.

149

150 A previous study found that LAR-RPTP ablation induced no strong defects in glutamate release,  
151 but regulated NMDARs through a transsynaptic mechanism (Sclip and Südhof, 2020). These  
152 findings are consistent with the near-normal synaptic ultrastructure and active zone assembly  
153 (Fig. 2). We complemented this recent study by whole-cell recordings of inhibitory postsynaptic  
154 currents (IPSCs, Fig. 3), which were not previously assessed after LAR-RPTP ablation. Release  
155 evoked by single action potentials was similar between control<sup>RPTP</sup> and cTKO<sup>RPTP</sup> neurons and  
156 IPSC kinetics were unaffected. The IPSC ratio of two consecutive stimuli (paired pulse ratio),  
157 which is inversely proportional to vesicular release probability (Zucker and Regehr, 2002), was  
158 also unaffected. We conclude that synaptic vesicle exocytosis, here monitored via IPSCs, is not  
159 impaired by LAR-RPTP knockout.

160

## 161 **Discussion**

162 Overall, we demonstrate that ablation of LAR-RPTPs from vertebrate synapses does not alter  
163 synapse density, vesicle docking, membrane anchoring of active zones, and synaptic vesicle  
164 release. This aligns with a parallel study that reported no loss of synaptic puncta and efficient

165 release at excitatory synapses in cultured hippocampal neurons and in acute hippocampal brain  
166 slices (Sclip and Südhof, 2020) upon LAR-RPTP knockout, but contrasts RNAi-based studies  
167 that led to models in which these RPTPs are major synapse organizers (Dunah et al., 2005;  
168 Fukai and Yoshida, 2020; Han et al., 2018, 2020a, 2020b; Kwon et al., 2010; Takahashi and  
169 Craig, 2013; Um and Ko, 2013; Yim et al., 2013). LAR-RPTPs belong to the superfamily of  
170 RPTPs (Johnson and Van Vactor, 2003), and it is possible that different RPTPs compensate for  
171 their loss. We note, however, that the time course of deletion in our knockout experiments is  
172 similar to the time course that is used in most RNAi-knockdown studies, and is hence unlikely to  
173 explain the differences. Other contributing factors could be different experimental preparations  
174 and off-target effects of knockdowns, which may generate artifacts in synapse formation  
175 experiments (Südhof, 2018). Altogether, we conclude that, while biochemical and synapse  
176 formation assays support synaptogenic activities for these proteins, synapses persist upon LAR-  
177 RPTP ablation, and their structure and function do not necessitate these proteins.

178  
179 Our study establishes specific localization of PTP $\delta$  extracellular domains to the synaptic cleft.  
180 Hence, PTP $\delta$  is correctly positioned to locally execute synaptic functions, for example for  
181 shaping cleft geometry, to modulate presynaptic plasticity, or to control postsynaptic receptors  
182 (Biederer et al., 2017; Sclip and Südhof, 2020; Uetani et al., 2000). Such functions would not be  
183 at odds with the relatively mild structural and functional effects after LAR-RPTP ablation, nor  
184 with upstream functions in neurite outgrowth and axon targeting (Ackley et al., 2005; Clandinin  
185 et al., 2001; Desai et al., 1997; Krueger et al., 1996; Prakash et al., 2009; Shishikura et al.,  
186 2016). Mechanisms of active zone anchoring to the target membrane, however, remain  
187 unresolved. Deletion of the major candidates, Cav2 channels (Held et al., 2020), Neurexins  
188 (Chen et al., 2017), and now LAR-PTPs (Figs. 1, 2) produce no major structural defects,  
189 indicating that active zones are most likely anchored to the plasma membrane through multiple  
190 parallel pathways (Emperador-Melero and Kaeser, 2020).

191



192 **Acknowledgements**

193 We thank J. Wang, M. Han and C. Qiao for technical support, Dr. H. Nyitrai for help and advice,  
194 Dr. F. Nakamura for PTP $\delta$  antibodies, and Drs. M. Verhage and J. Broeke for the SynapseEM  
195 MATLAB macro. This work was supported by grants from the NIH (R01NS083898 and  
196 R01MH113349 to PSK), the Lefler Foundation (to PSK), the Armenise Harvard Foundation (to  
197 PSK), and a fellowship from the Alice and Joseph E. Brooks postdoctoral fund (to JEM). For  
198 mutant mice, we thank the Wellcome Trust Sanger Institute Mouse Genetics Project (Sanger  
199 MGP), its funders and INFRAFRONTIER/EMMA ([www.infrafrontier.eu](http://www.infrafrontier.eu), *Ptprd*, funding  
200 information may be found at [www.sanger.ac.uk/mouseportal](http://www.sanger.ac.uk/mouseportal) and associated primary phenotypic  
201 information at [www.mousephenotype.org](http://www.mousephenotype.org)), the Canadian Mouse Mutant Repository at the  
202 Hospital for Sick Children (*Ptprs*), and the Helmholtz Zentrum München (*Ptprf*). We thank the  
203 Dana-Farber/Harvard Cancer Center for the use of the Transgenic Mouse Core (in part  
204 supported by an NCI Cancer Center Support Grant # P30CA006516), which performed cryo-  
205 recovery, embryonic stem cell expansion, and blastocyst injections. We acknowledge the  
206 Neurobiology Imaging Facility (supported by a P30 Core Center Grant NS072030), and the  
207 Electron Microscopy Facility at Harvard Medical School.

208

209 **Author contributions**

210 Conceptualization, J.E-M. and P.S.K.; Methodology, J.E-M. and G.dN.; Investigation, J.E-M.  
211 and G.dN.; Formal Analysis, J.E-M., G.dN. and PSK; Writing-Original Draft, J.E-M and P.S.K.;  
212 Supervision, P.S.K.; Funding Acquisition, P.S.K.

213

214 **Conflict of interest statement**

215 The authors declare no competing interests.

216

217 **Materials and methods**

218 **Mouse lines.** PTP $\delta$  (*Ptprd*) mice were acquired as frozen embryos from the Wellcome Trust  
219 Sanger Institute (*Ptprd*<sup>tm2a(KOMP)Wtsi</sup>; clone EPD0581\_9\_D04, MGI:4458607,  
220 RRID:IMSR\_EM:11805) and the same mutant allele was described in previous studies (Farhy-  
221 Tselnicker et al., 2017; Sclip and Südhof, 2020). PTP $\sigma$  (*Ptprs*) mice were obtained as frozen  
222 sperm from the Canadian Mouse Mutant Repository at the Hospital for Sick Children  
223 (C57BL/6N-*Ptprs*<sup>tm1a(KOMP)Mbp/Tcp</sup>; clone DEPD00535\_1\_D11; MGI:4840831,  
224 RRID:IMSR\_CMMR:ABCA), and were also used previously (Bunin et al., 2015; Sclip and  
225 Südhof, 2020). Embryonic stem cells containing the LAR (*Ptprf*) mutant allele were obtained  
226 from the Helmholtz Zentrum München (*Ptprf*<sup>tm1a(EUCOMM)Wtsi</sup>; clone EPD0697\_1\_D03;  
227 MGI:4887720). Mutant alleles were originally generated using homologous recombination by the  
228 international knockout consortium (Bradley et al., 2012; Skarnes et al., 2011). Frozen embryos  
229 (PTP $\delta$ ), frozen sperm (PTP $\sigma$ ) or embryonic stem cells (LAR) were used to establish the  
230 respective mouse lines through the Transgenic Mouse Core (DF/HCC) at Harvard Medical  
231 School. For generation of the LAR mutant mice, the embryonic stem cells were expanded, the  
232 genotype was confirmed by PCR and sequencing, and injection into C57BL/6 blastocysts was  
233 used to generate chimeric founders. After germline transmission, the mice were crossed to Flp-  
234 expressing mice (Dymecki, 1996) to remove the LacZ and Neomycin cassettes to generate the  
235 conditional allele. The same crossing was performed with the cryo-recovered PTP $\delta$  and PTP $\sigma$   
236 mice. This strategy generated conditional “floxed” alleles for each gene, in which exon 23 for  
237 *Ptprd*, exon 4 for *Ptprs*, and exons 8, 9 and 10 for *Ptprf* were flanked by loxP sites. Survival of  
238 each individual floxed allele was analyzed in offsprings of heterozygote matings through  
239 comparison of obtained genotypes of offsprings on or after P14 to expected genotypes for  
240 Mendelian inheritance. The three floxed lines were intercrossed and maintained as triple-  
241 homozygote mice. The conditional PTP $\delta$ , PTP $\sigma$  and LAR alleles were genotyped using the  
242 oligonucleotide primers CAGAGGTGGCTCATGTGC and GCCCAACCCTCAATTGTCAGAC

243 (PTP $\delta$ , 465 and 287 bp bands for the floxed and wild-type alleles, respectively),  
244 GAGTCCTCAAACCAGGCCCTG and GGTGAGACCAGGGTGGGTTC (PTP $\sigma$ , 522 and 345 bp  
245 bands for the floxed and wild-type alleles, respectively), and CAGAGGTGGCTCATGTGC and  
246 GCCCAACCCTCAATTGTCAGAC (LAR, 498 and 289 bp bands for the floxed and wild-type  
247 alleles, respectively). All animal experiments were approved by the Harvard University Animal  
248 Care and Use Committee.

249

250 **Neuronal cultures and production of lentiviruses.** Primary hippocampal cultures were  
251 prepared as described (Emperador-Melero et al., 2020; Held et al., 2020; Wong et al., 2018).  
252 Briefly, hippocampi of newborn (postnatal days P0 or P1) pups were digested in papain, and  
253 neurons were plated onto glass coverslips in Plating Medium composed of Minimum Essential  
254 Medium (MEM) supplemented with 0.5% glucose, 0.02% NaHCO<sub>3</sub>, 0.1 mg/ml transferrin, 10%  
255 Fetal Select bovine serum, 2mM L-glutamine, and 25 mg/ml insulin. After 24 h, Plating Medium  
256 was exchanged with Growth Medium composed of MEM with 0.5% glucose, 0.02% NaHCO<sub>3</sub>,  
257 0.1 mg/ml transferrin, 5% Fetal Select bovine serum (Atlas Biologicals), 2% B-27 supplement,  
258 and 0.5 mM L-glutamine. At DIV2-3, Cytosine b-D-arabinofuranoside (AraC) was added to a  
259 final concentration of 1 to 2 mM. Cultures were kept in a 37 °C incubator for a total of 14 to 16 d  
260 before analyses proceeded. Lentiviruses were produced in HEK293T cells maintained in DMEM  
261 supplemented with 10% bovine serum and 1% penicillin/streptomycin. HEK293T cells were  
262 transfected using calcium phosphate precipitation with a combination of three lentiviral  
263 packaging plasmids (REV, RRE and VSV-G) and a separate plasmid encoding either Cre  
264 recombinase or inactive Cre, at a molar ratio of 1:1:1:1. 24 h after transfection, the medium was  
265 changed to neuronal growth medium and 18 - 30 h later the supernatant was used for viral  
266 transduction. Neuronal cultures were infected 6 d after plating with lentiviruses expressing GFP-  
267 Cre or an inactive variant of GFP-Cre expressed under the human Synapsin promotor (Liu et  
268 al., 2014), and infection rates were assessed via nuclear GFP. Only cultures in which no non-

269 infected neurons could be detected were used for analyses.

270

271 **Western blotting.** Cell lysates were collected from DIV14-15 neuronal cultures in a 1x sodium  
272 dodecyl sulfate (SDS) solution in PBS. For tissue collection, brains of postnatal day P21 to P28  
273 mice were homogenized using a glass-Teflon homogenizer in 5 ml of ice-cold homogenizing  
274 solution (150 mM NaCl, 25 mM HEPES, 4 mM EDTA and 1% Triton X-100, pH 7.5), following  
275 addition of SDS (to a final concentration of 1x). All samples were denatured at 100 °C for 10  
276 min, run on SDS-PAGE gels, and then transferred to nitrocellulose membranes for 6.5 h at 4 °C  
277 in buffer containing (per l) 200 ml methanol, 14 g glycine and 6 g Tris. Next, membranes were  
278 blocked for 1 h at room temperature in saline buffer with 10% non-fat milk powder and 5%  
279 normal goat serum. Membranes were incubated in primary antibodies overnight at 4 °C in PBS  
280 with 5% milk and 2.5% goat serum, followed by 1 h incubation with horseradish peroxidase  
281 (HRP)-conjugated secondaries at room temperature. Three 5 min washes were performed  
282 between every step. Protein bands were visualized using chemiluminescence and exposure to  
283 film. The primary antibodies were: goat anti-PTP $\sigma$  (A114, 1:200, RRID: AB\_2607944), rat anti-  
284 PTP $\delta$  (A229, 1:500, gift of Dr. F. Nakamura (Shishikura et al., 2016)), mouse anti-LAR (A156,  
285 1:500, clone E9B9S from Cell signaling), and mouse anti-Synaptophysin (A100, 1: 5000, RRID:  
286 AB\_887824). For PTP $\sigma$ , normal goat serum was substituted by rabbit serum. The secondary  
287 antibodies were HRP-conjugated goat anti-mouse IgG (S44, 1:10000, RRID:AB\_2334540),  
288 HRP-conjugated goat anti-rabbit IgG (S45, 1:10000, RRID:AB\_2334589), HRP-conjugated goat  
289 anti-rat IgG (S46, 1:10000, RRID:AB\_10680316), and HRP-conjugated anti-goat antibodies  
290 (S60, 1:10000).

291

292 **Immunofluorescence staining of neurons.** Neurons grown on #1.5 glass coverslips were  
293 fixed at DIV15 in 4 % paraformaldehyde (PFA) for 10 min (except for staining with anti-Cav2.1  
294 antibodies, for which 2% PFA was used), followed by blocking and permeabilization in PBS

295 containing 3% BSA/0.1% Triton X-100/PBS for 1 h at room temperature. Incubation with primary  
296 and secondary antibodies was performed overnight at 4 °C and for 1 h at room temperature,  
297 respectively. Samples were post-fixed in 4% PFA for 10 min and mounted onto glass slides  
298 using ProLong diamond mounting medium. Antibodies were diluted in blocking solution. Three 5  
299 min washes with PBS were performed between steps. Primary antibodies used were: rabbit  
300 anti-Liprin- $\alpha$ 3 (A232, 1:250; home-made (Emperador-Melero et al., 2020)), rabbit anti-RIM (A58,  
301 1:500, RRID: AB\_887774), mouse anti-PSD-95 (A149, 1:500; RRID: AB\_10698024), mouse  
302 anti-Gephyrin (A8, 1:500; RRID:AB\_2232546), guinea pig anti-Synaptophysin (A106, 1:500;  
303 RRID: AB\_1210382), rabbit anti-Munc13-1 (A72, 1:500; RRID: AB\_887733), rat anti-PTP $\delta$   
304 (A229; 1:500; gift of Dr. F. Nakamura (Shishikura et al., 2016)), and rabbit anti-Cav2.1 (A46,  
305 1:500; RRID: AB\_2619841). Secondary antibodies used: goat anti-rabbit Alexa Fluor 488 (S5;  
306 1:500, RRID:AB\_2576217), goat anti-mouse IgG1 Alexa Fluor 555 (S19, 1:500, RRID:  
307 AB\_2535769), goat anti-mouse IgG2a Alexa Fluor 633 (S30, 1:500, RRID: AB\_1500826), goat  
308 anti-guinea pig IgG Alexa Fluor 405 (S51, 1:500, RRID: RRID:AB\_2827755).

309

310 **STED and confocal imaging.** All images were acquired as described (Emperador-Melero et  
311 al., 2020; Held et al., 2020; Wong et al., 2018) using a Leica SP8 Confocal/STED 3X  
312 microscope equipped with an oil-immersion 100X 1.44-N.A objective, white lasers, gated  
313 detectors, and 592 nm and 660 and 770 nm depletion lasers. For every region of interest (ROI),  
314 quadruple color sequential confocal scans for Synaptophysin, PSD-95, Gephyrin and a protein  
315 of interest (RIM, Munc13-1, PTP $\delta$ , Liprin- $\alpha$  or Cav2.1) were followed by triple-color sequential  
316 STED scans for PSD-95, Gephyrin and the protein of interest. Synaptophysin was only imaged  
317 in confocal mode because of depletion laser limitations. Identical settings were applied to all  
318 samples within an experiment. For analyses of synapse density, Synaptophysin signals were  
319 used to generate ROIs using automatic detection with a size filter of 0.4 - 2  $\mu\text{m}^2$  (code available  
320 at [https://github.com/kaeserlab/3DSIM\\_Analysis\\_CL](https://github.com/kaeserlab/3DSIM_Analysis_CL) and

321 [https://github.com/hmslcl/3D\\_SIM\\_analysis\\_HMS\\_Kaesar-lab\\_CL](https://github.com/hmslcl/3D_SIM_analysis_HMS_Kaesar-lab_CL)) and as described before  
322 (Emperador-Melero et al., 2020; Held et al., 2020; Liu et al., 2018). To measure synaptic levels  
323 of PTP $\delta$ , RIM, Munc13-1, Liprin- $\alpha$ 3 and Cav2.1 in confocal mode, a mask was generated in  
324 ImageJ using an automatic threshold in the Synaptophysin or the PSD-95 channel, and the  
325 levels were measured within that mask. For STED quantification, side-view synapses were  
326 selected while blind to the protein of interest. They were defined as synapses that contained a  
327 vesicle cluster (imaged in confocal mode) with a single bar-like Gephyrin or PSD-95 structure  
328 (imaged by STED) along the edge of the vesicle cluster. A 1  $\mu$ m-long, 250-nm-wide profile was  
329 selected perpendicular to the postsynaptic density marker and across its center. The peak  
330 levels of the protein of interest were then measured as the maximum intensity of the line profile  
331 within 100 nm of the postsynaptic density marker peaks (estimated area based on Wong et al.,  
332 2018) after applying a 5-pixel rolled average. For side-view plots, line scans from individual  
333 side-view synapses were aligned to the peak of PSD-95 or Gephyrin after the 5-pixel rolling  
334 average was applied, and averaged across images. Only for representative images, a smooth  
335 filter was added, brightness and contrast were linearly adjusted, and images were interpolated  
336 to match publication standards. These adjustments were made identically for images within an  
337 experiment. All quantitative analyses were performed on original images without any  
338 processing, and all data were acquired and analyzed by an experimenter blind to genotype. For  
339 PTP $\delta$  STED analyses, synapses were considered PTP $\delta$ -positive if the peak intensity was higher  
340 than three standard deviations above the average of the cTKO<sup>RPTP</sup> signal, assessed separately  
341 in each individual culture.

342

343 **High-pressure freezing and electron microscopy.** Electron microscopy was performed as  
344 previously described (Held et al., 2020; Wang et al., 2016). Briefly, DIV15 neurons grown on 6  
345 mm sapphire cover slips were frozen with a Leica EM ICE high pressure freezer in extracellular  
346 solution containing 140 mM NaCl, 5 mM KCl, 2 mM CaCl<sub>2</sub>, 2 mM MgCl<sub>2</sub>, 10 mM glucose, 10 mM

347 Hepes, 20  $\mu$ M CNQX, 50  $\mu$ M AP5 and 50  $\mu$ M picrotoxin (pH 7.4,  $\sim$ 310 mOsm). Freeze-  
348 substitution was done in acetone containing 1% osmium tetroxide, 1% glutaraldehyde, and 1%  
349 H<sub>2</sub>O as follows: -90 °C for 5 h, 5 °C per h to -20 °C, -20 °C for 12 h, and 10 °C per hour to 20  
350 °C. Samples were then infiltrated in epoxy resin, and baked at 60 °C for 48 h followed by 80 °C  
351 overnight. Next, sapphire coverslips were removed from the resin block by heat shock, and  
352 samples were sectioned at 50 nm with a Leica EM UC7 ultramicrotome. Sections were mounted  
353 on a nickel slot grid with a carbon coated formvar support film, and counterstained by incubation  
354 with 2% lead acetate solution for 10 s, followed by rinsing with distilled water. Samples were  
355 imaged with a JEOL 1200EX transmission electron microscope equipped with an AMT 2k CCD  
356 camera. Images were analyzed using SynapseEM, a MATLAB macro provided by Drs. M.  
357 Verhage and J. Broeke. Bouton area was measured by outlining the perimeter of each synapse  
358 profile. Docked vesicles were defined as vesicles touching the presynaptic plasma membrane  
359 opposed to the PSD, with the electron density of the vesicular membrane merging with that of  
360 the target membrane. Synapse width was measured as the area between synaptically apposed  
361 cells in which an evenly spaced cleft was present and associated with pre- and postsynaptic  
362 densities. All data were acquired and analyzed by an experimenter blind to the genotype.

363

364 **Electrophysiology.** Electrophysiological recordings were performed as described before  
365 (Emperador-Melero et al., 2020; Held et al., 2020; Wang et al., 2016). Neurons were recorded  
366 at DIV15-16 in whole-cell patch-clamp configuration at room temperature in extracellular  
367 solution containing (in mM) 140 NaCl, 5 KCl, 1.5 CaCl<sub>2</sub>, 2 MgCl<sub>2</sub>, 10 HEPES (pH 7.4) and 10  
368 Glucose, supplemented with 20  $\mu$ M CNQX and 50  $\mu$ M D-AP5 to block AMPA and NMDA  
369 receptors, respectively. Glass pipettes were pulled at 2.5 – 4 M $\Omega$  and filled with intracellular  
370 solutions containing (in mM) 40 CsCl, 90 K-Gluconate, 1.8 NaCl, 1.7 MgCl<sub>2</sub>, 3.5 KCl, 0.05  
371 EGTA, 10 HEPES, 2 MgATP, 0.4 Na<sub>2</sub>-GTP, 10 phosphocreatine, CsOH and 4 mM QX314-Cl

372 (pH 7.4). Neurons were clamped at -70 mV, series resistance was compensated to 4 – 5 M $\Omega$ ,  
373 and recordings in which the uncompensated series resistance was >15 M $\Omega$  at any time during  
374 the experiment were discarded. Electrical stimulation was applied using a custom bipolar  
375 electrode made from Nichrome wire. A Multiclamp 700B amplifier and a Digidata 1550 digitizer  
376 were used for data acquisition, sampling at 10 kHz and filtering at 2 kHz. Data were analyzed  
377 using pClamp. The experimenter was blind during data acquisition and analyses.

378

379 **Statistics.** Summary data are shown as mean  $\pm$  SEM. Unless noted otherwise, significance  
380 was assessed using t-tests or Mann-Whitney U tests depending on whether assumptions of  
381 normality and homogeneity of variances were met (assessed using Shapiro or Levene's tests,  
382 respectively). Two-way ANOVA tests on a 200 nm wide window centered around the PSD-95  
383 peak were used for line profile analyses of STED data, and Chi-square tests were used to  
384 assess mouse survival ratios. All data were analyzed by an experimenter blind to the genotype.  
385 For each dataset, the specific tests used are stated in each figure legend.

386



387 **References**

- 388 Ackley, B.D., Harrington, R.J., Hudson, M.L., Williams, L., Kenyon, C.J., Chisholm, A.D., and  
389 Jin, Y. (2005). The two isoforms of the *Caenorhabditis elegans* leukocyte-common antigen  
390 related receptor tyrosine phosphatase PTP-3 function independently in axon guidance and  
391 synapse formation. *J. Neurosci.* *25*, 7517–7528.
- 392 Aicher, B., Lerch, M.M., Müller, T., Schilling, J., and Ullrich, A. (1997). Cellular redistribution of  
393 protein tyrosine phosphatases LAR and PTPsigma by inducible proteolytic processing. *J.*  
394 *Cell Biol.* *138*, 681–696.
- 395 Biederer, T., Kaeser, P.S., and Blanpied, T.A. (2017). Transcellular Nanoalignment of Synaptic  
396 Function. *Neuron* *96*, 680–696.
- 397 Bomkamp, C., Padmanabhan, N., Karimi, B., Ge, Y., Chao, J.T., Loewen, C.J.R., Siddiqui, T.J.,  
398 and Craig, A.M. (2019). Mechanisms of PTP $\sigma$ -Mediated Presynaptic Differentiation. *Front.*  
399 *Synaptic Neurosci.* *11*, 17.
- 400 Bradley, A., Anastassiadis, K., Ayadi, A., Battey, J.F., Bell, C., Birling, M.-C., Bottomley, J.,  
401 Brown, S.D., Bürger, A., Bult, C.J., et al. (2012). The mammalian gene function resource:  
402 the International Knockout Mouse Consortium. *Mamm. Genome* *23*, 580–586.
- 403 Bunin, A., Sisirak, V., Ghosh, H.S., Grajkowska, L.T., Hou, Z.E., Miron, M., Yang, C., Ceribelli,  
404 M., Uetani, N., Chaperot, L., et al. (2015). Protein Tyrosine Phosphatase PTPRS Is an  
405 Inhibitory Receptor on Human and Murine Plasmacytoid Dendritic Cells. *Immunity* *43*,  
406 277–288.
- 407 Chen, L.Y., Jiang, M., Zhang, B., Gokce, O., and Sudhof, T.C. (2017). Conditional Deletion of  
408 All Neurexins Defines Diversity of Essential Synaptic Organizer Functions for Neurexins.  
409 *Neuron* *94*, 611-625.e4.
- 410 Clandinin, T.R., Lee, C.H., Herman, T., Lee, R.C., Yang, A.Y., Ovasapyan, S., and Zipursky,  
411 S.L. (2001). *Drosophila* LAR regulates R1-R6 and R7 target specificity in the visual system.  
412 *Neuron* *32*, 237–248.
- 413 Desai, C.J., Krueger, N.X., Saito, H., and Zinn, K. (1997). Competition and cooperation among  
414 receptor tyrosine phosphatases control motoneuron growth cone guidance in *Drosophila*.  
415 *Development* *124*, 1941–1952.
- 416 Dunah, A.W., Hueske, E., Wyszynski, M., Hoogenraad, C.C., Jaworski, J., Pak, D.T., Simonetta,  
417 A., Liu, G., and Sheng, M. (2005). LAR receptor protein tyrosine phosphatases in the  
418 development and maintenance of excitatory synapses. *Nat. Neurosci.* *8*, 458–467.
- 419 Dymecki, S.M. (1996). Flp recombinase promotes site-specific DNA recombination in embryonic  
420 stem cells and transgenic mice. *Proc. Natl. Acad. Sci. U. S. A.* *93*, 6191–6196.
- 421 Elchebly, M., Wagner, J., Kennedy, T.E., Lanctôt, C., Michaliszyn, E., Itié, A., Drouin, J., and  
422 Tremblay, M.L. (1999). Neuroendocrine dysplasia in mice lacking protein tyrosine  
423 phosphatase  $\sigma$ . *Nat. Genet.* *21*, 330–333.
- 424 Emperador-Melero, J., and Kaeser, P.S. (2020). Assembly of the presynaptic active zone. *Curr.*  
425 *Opin. Neurobiol.* *63*, 95–103.
- 426 Emperador-Melero, J., Wong, M.Y., Wang, S.S.H., De Nola, G., Kirchhausen, T., and Kaeser,  
427 P.S. (2020). Phosphorylation triggers presynaptic phase separation of Liprin- $\alpha$ 3 to control  
428 active zone structure. *BioRxiv* 2020.10.28.357574.
- 429 Farhy-Tselnicker, I., van Casteren, A.C.M., Lee, A., Chang, V.T., Aricescu, A.R., and Allen, N.J.

- 430 (2017). Astrocyte-Secreted Glypican 4 Regulates Release of Neuronal Pentraxin 1 from  
431 Axons to Induce Functional Synapse Formation. *Neuron* 96, 428-445.e13.
- 432 Fukai, S., and Yoshida, T. (2020). Roles of type IIa receptor protein tyrosine phosphatases as  
433 synaptic organizers. *FEBS J.* febs.15666.
- 434 Han, K.A., Ko, J.S., Pramanik, G., Kim, J.Y., Tabuchi, K., Um, J.W., and Ko, J. (2018). PTP $\sigma$   
435 Drives Excitatory Presynaptic Assembly via Various Extracellular and Intracellular  
436 Mechanisms. *J. Neurosci.* 38, 6700–6721.
- 437 Han, K.A., Kim, Y.-J., Yoon, T.H., Kim, H., Bae, S., Um, J.W., Choi, S.-Y., and Ko, J. (2020a).  
438 LAR-RPTPs Directly Interact with Neurexins to Coordinate Bidirectional Assembly of  
439 Molecular Machineries. *J. Neurosci.* 40, 8438–8462.
- 440 Han, K.A., Lee, H.-Y., Lim, D., Shin, J., Yoon, T.H., Lee, C., Rhee, J.-S., Liu, X., Um, J.W.,  
441 Choi, S.-Y., et al. (2020b). PTP $\sigma$  Controls Presynaptic Organization of Neurotransmitter  
442 Release Machinery at Excitatory Synapses. *IScience* 23, 101203.
- 443 Held, R.G., Liu, C., Ma, K., Ramsey, A.M., Tarr, T.B., De Nola, G., Wang, S.S.H., Wang, J., van  
444 den Maagdenberg, A.M.J.M., Schneider, T., et al. (2020). Synapse and Active Zone  
445 Assembly in the Absence of Presynaptic Ca<sup>2+</sup> Channels and Ca<sup>2+</sup> Entry. *Neuron* 107,  
446 667-683.e9.
- 447 Horn, K.E., Xu, B., Gobert, D., Hamam, B.N., Thompson, K.M., Wu, C.-L., Bouchard, J.-F.,  
448 Uetani, N., Racine, R.J., Tremblay, M.L., et al. (2012). Receptor protein tyrosine  
449 phosphatase sigma regulates synapse structure, function and plasticity. *J. Neurochem.*  
450 122, 147–161.
- 451 Johnson, K.G., and Van Vactor, D. (2003). Receptor Protein Tyrosine Phosphatases in Nervous  
452 System Development. *Physiol. Rev.* 83, 1–24.
- 453 Kaufmann, N., DeProto, J., Ranjan, R., Wan, H., and Van Vactor, D. (2002). Drosophila liprin-  
454 alpha and the receptor phosphatase Dlar control synapse morphogenesis. *Neuron* 34, 27–  
455 38.
- 456 Krueger, N.X., Van Vactor, D., Wan, H.I., Gelbart, W.M., Goodman, C.S., and Saito, H. (1996).  
457 The Transmembrane Tyrosine Phosphatase DLAR Controls Motor Axon Guidance in  
458 Drosophila. *Cell* 84, 611–622.
- 459 Kwon, S.-K., Woo, J., Kim, S.-Y., Kim, H., and Kim, E. (2010). Trans-synaptic Adhesions  
460 between Netrin-G Ligand-3 (NGL-3) and Receptor Tyrosine Phosphatases LAR, Protein-  
461 tyrosine Phosphatase  $\delta$  (PTP $\delta$ ), and PTP $\sigma$  via Specific Domains Regulate Excitatory  
462 Synapse Formation. *J. Biol. Chem.* 285, 13966–13978.
- 463 Liu, C., Bickford, L.S., Held, R.G., Nyitrai, H., Sudhof, T.C., and Kaeser, P.S. (2014). The Active  
464 Zone Protein Family ELKS Supports Ca<sup>2+</sup> Influx at Nerve Terminals of Inhibitory  
465 Hippocampal Neurons. *J. Neurosci.* 34, 12289–12303.
- 466 Liu, C., Kershberg, L., Wang, J., Schneeberger, S., and Kaeser, P.S. (2018). Dopamine  
467 Secretion Is Mediated by Sparse Active Zone-like Release Sites. *Cell* 172, 706–718.
- 468 McDonald, N.A., Fetter, R.D., and Shen, K. (2020). Assembly of synaptic active zones requires  
469 phase separation of scaffold molecules. *Nature* 588, 454–458.
- 470 Park, H., Choi, Y., Jung, H., Kim, S., Lee, S., Han, H., Kweon, H., Kang, S., Sim, W.S.,  
471 Koopmans, F., et al. (2020). Splice-dependent trans-synaptic PTP $\delta$ -IL1RAPL1 interaction  
472 regulates synapse formation and non-REM sleep. *EMBO J.* 39, e104150.
- 473 Perez de Arce, K., Schrod, N., Metzbower, S.W.R., Allgeyer, E., Kong, G.K.-W., Tang, A.-H.,

- 474 Krupp, A.J., Stein, V., Liu, X., Bewersdorf, J., et al. (2015). Topographic Mapping of the  
475 Synaptic Cleft into Adhesive Nanodomains. *Neuron* 88, 1165–1172.
- 476 Prakash, S., McLendon, H.M., Dubreuil, C.I., Ghose, A., Hwa, J., Dennehy, K.A., Tomalty,  
477 K.M.H., Clark, K.L., Van Vactor, D., and Clandinin, T.R. (2009). Complex interactions  
478 amongst N-cadherin, DLAR, and Liprin-alpha regulate Drosophila photoreceptor axon  
479 targeting. *Dev. Biol.* 336, 10–19.
- 480 Pulido, R., Serra-Pages, C., Tang, M., and Streuli, M. (1995). The LAR/PTP delta/PTP sigma  
481 subfamily of transmembrane protein-tyrosine-phosphatases: multiple human LAR, PTP  
482 delta, and PTP sigma isoforms are expressed in a tissue-specific manner and associate  
483 with the LAR-interacting protein LIP.1. *Proc. Natl. Acad. Sci.* 92, 11686–11690.
- 484 Rizalar, F.S., Roosen, D.A., and Haucke, V. (2021). A Presynaptic Perspective on Transport  
485 and Assembly Mechanisms for Synapse Formation. *Neuron* 109, 27–41.
- 486 Sclip, A., and Südhof, T.C. (2020). LAR receptor phospho-tyrosine phosphatases regulate  
487 NMDA-receptor responses. *Elife* 9.
- 488 Serra-Pages, C., Medley, Q.G., Tang, M., Hart, A., and Streuli, M. (1998). Liprins, a family of  
489 LAR transmembrane protein-tyrosine phosphatase-interacting proteins. *J. Biol. Chem.* 273,  
490 15611–15620.
- 491 Shishikura, M., Nakamura, F., Yamashita, N., Uetani, N., Iwakura, Y., and Goshima, Y. (2016).  
492 Expression of receptor protein tyrosine phosphatase  $\delta$ , PTP $\delta$ , in mouse central nervous  
493 system. *Brain Res.* 1642, 244–254.
- 494 Skarnes, W.C., Rosen, B., West, A.P., Koutsourakis, M., Bushell, W., Iyer, V., Mujica, A.O.,  
495 Thomas, M., Harrow, J., Cox, T., et al. (2011). A conditional knockout resource for the  
496 genome-wide study of mouse gene function. *Nature* 474, 337–342.
- 497 Südhof, T.C. (2012). The Presynaptic Active Zone. *Neuron* 75, 11–25.
- 498 Südhof, T.C. (2018). Towards an Understanding of Synapse Formation. *Neuron* 100, 276–293.
- 499 Takahashi, H., and Craig, A.M. (2013). Protein tyrosine phosphatases PTP $\delta$ , PTP $\sigma$ , and LAR:  
500 presynaptic hubs for synapse organization. *Trends Neurosci.* 36, 522–534.
- 501 Takahashi, H., Arstikaitis, P., Prasad, T., Bartlett, T.E., Wang, Y.T., Murphy, T.H., and Craig,  
502 A.M. (2011). Postsynaptic TrkC and Presynaptic PTP $\sigma$  Function as a Bidirectional  
503 Excitatory Synaptic Organizing Complex. *Neuron* 69, 287–303.
- 504 Uetani, N., Kato, K., Ogura, H., Mizuno, K., Kawano, K., Mikoshiba, K., Yakura, H., Asano, M.,  
505 and Iwakura, Y. (2000). Impaired learning with enhanced hippocampal long-term  
506 potentiation in PTPdelta-deficient mice. *EMBO J.* 19, 2775–2785.
- 507 Um, J.W., and Ko, J. (2013). LAR-RPTPs: Synaptic adhesion molecules that shape synapse  
508 development. *Trends Cell Biol.* 23, 465–475.
- 509 Wallace, M.J., Batt, J., Fladd, C.A., Henderson, J.T., Skarnes, W., and Rotin, D. (1999).  
510 Neuronal defects and posterior pituitary hypoplasia in mice lacking the receptor tyrosine  
511 phosphatase PTPsigma. *Nat. Genet.* 21, 334–338.
- 512 Wang, S.S.H., Held, R.G., Wong, M.Y., Liu, C., Karakhanyan, A., and Kaeser, P.S. (2016).  
513 Fusion Competent Synaptic Vesicles Persist upon Active Zone Disruption and Loss of  
514 Vesicle Docking. *Neuron* 91, 777–791.
- 515 Wong, M.Y., Liu, C., Wang, S.S.H., Roquas, A.C.F., Fowler, S.C., and Kaeser, P.S. (2018).  
516 Liprin- $\alpha$ 3 controls vesicle docking and exocytosis at the active zone of hippocampal  
517 synapses. *Proc. Natl. Acad. Sci.* 115, 2234–2239.

- 518 Wu, X., Cai, Q., Shen, Z., Chen, X., Zeng, M., Du, S., and Zhang, M. (2019). RIM and RIM-BP  
519 Form Presynaptic Active-Zone-like Condensates via Phase Separation. *Mol. Cell* 73, 971-  
520 984.e5.
- 521 Yang, T., Bernabeu, R., Xie, Y., Zhang, J.S., Massa, S.M., Rempel, H.C., and Longo, F.M.  
522 (2003). Leukocyte Antigen-Related Protein Tyrosine Phosphatase Receptor: A Small  
523 Ectodomain Isoform Functions as a Homophilic Ligand and Promotes Neurite Outgrowth. *J.*  
524 *Neurosci.* 23, 3353–3363.
- 525 Yim, Y.S., Kwon, Y., Nam, J., Yoon, H.I., Lee, K., Kim, D.G., Kim, E., Kim, C.H., and Ko, J.  
526 (2013). Slitrks control excitatory and inhibitory synapse formation with LAR receptor protein  
527 tyrosine phosphatases. *Proc. Natl. Acad. Sci.* 110, 4057–4062.
- 528 Zucker, R.S., and Regehr, W.G. (2002). Short-term synaptic plasticity. *Annu. Rev. Physiol.* 64,  
529 355–405.
- 530

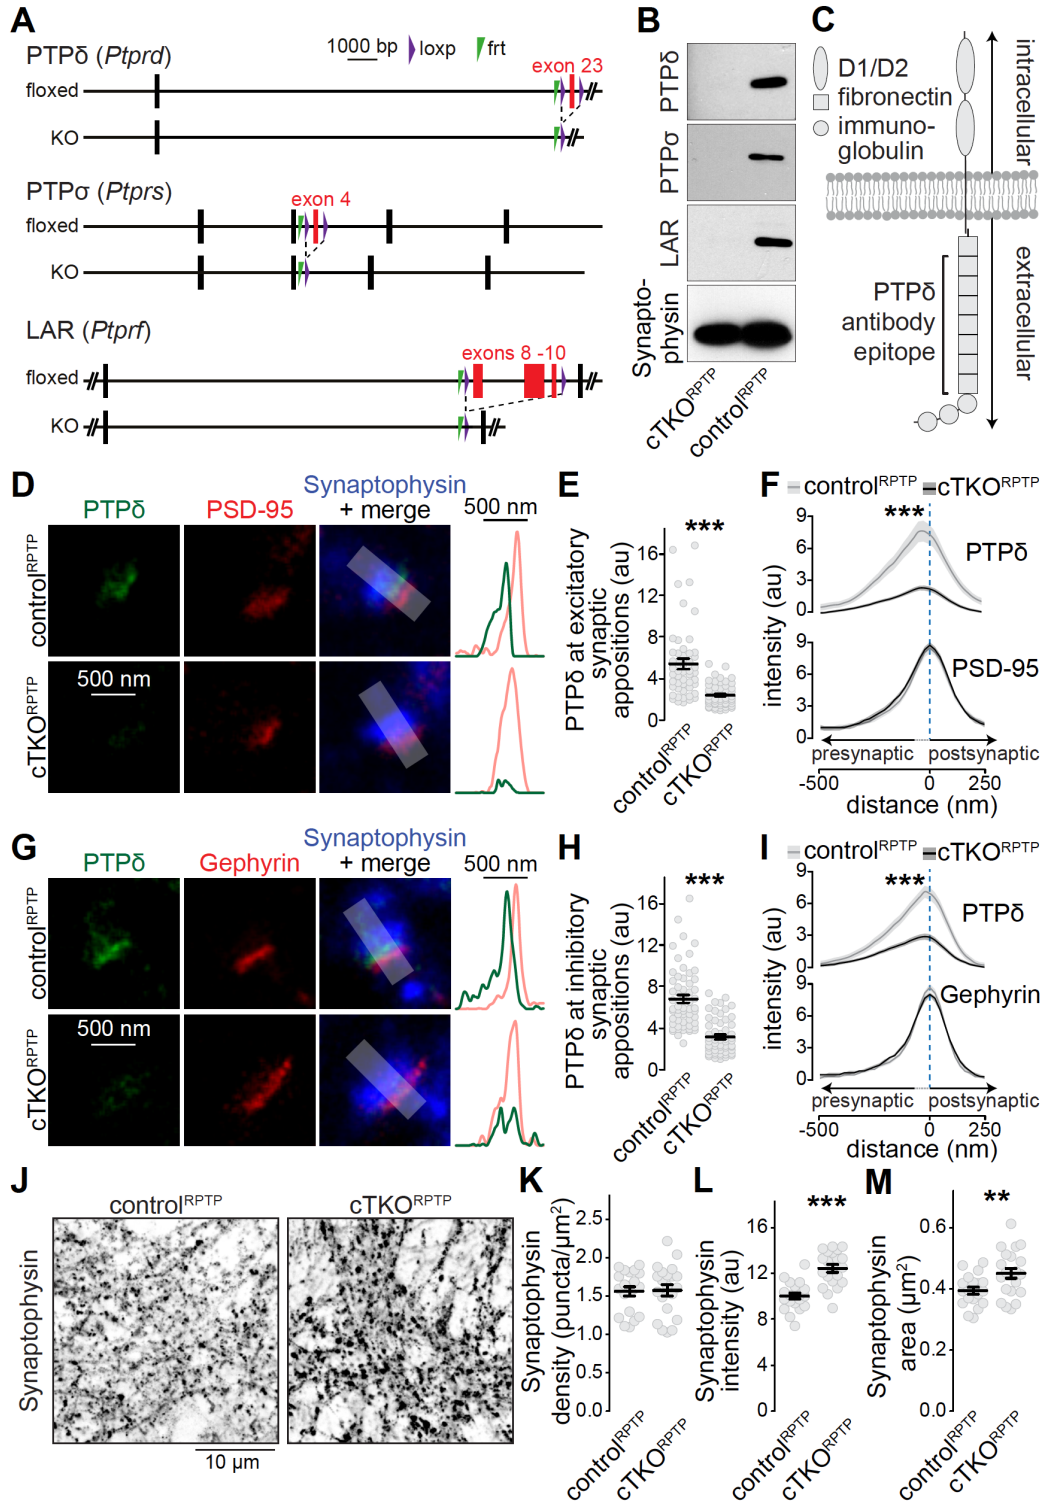

531

532 **Figure 1. Triple conditional LAR-RPTP knockout to assess nanoscale localization of**

533 **PTPδ and roles of LAR-RPTP in synapse formation**

534 **(A)** Diagram for simultaneous conditional knockout of PTPδ, PTPσ and LAR by cre

535 recombination.

536 **(B)** Example western blot of cultured neurons from PTP $\delta$ , PTP $\sigma$  and LAR triple floxed mice  
537 expressing Cre recombinase (to generate cTKO<sup>RPTP</sup> neurons) or truncated Cre (to generate  
538 control<sup>RPTP</sup> neurons). The bands detected in the cultured neurons correspond to the lower bands  
539 detected in brain homogenate shown in Fig. S1.

540 **(C)** Diagram showing the general structure of LAR-RPTPs and the antibody recognition site for  
541 PTP $\delta$  (antibodies were generated using a peptide containing fibronectin domains 2, 3 and 8  
542 (Shishikura et al., 2016)).

543 **(D-F)** STED images, (D) quantification of the peak intensity of PTP $\delta$  (E) and average intensity  
544 profiles for PTP $\delta$  and PSD-95 (F) at single excitatory synapses. Side-view synapses were  
545 identified by the presence of bar-like PSD-95 signals at the edge of the vesicle cloud marked by  
546 Synaptophysin. Intensity profiles of shaded areas in the overlap images were used to determine  
547 the peak intensity of the protein of interest, and are shown on the right of the corresponding  
548 image. N (control<sup>RPTP</sup>) = 50 synapses/3 cultures, N (cTKO<sup>RPTP</sup>) = 54/3.

549 **(G-I)** Same as D-F, but for inhibitory synapses identified by Gephyrin. N (control<sup>RPTP</sup>) = 58/3  
550 cultures, N (cTKO<sup>RPTP</sup>) = 59/3.

551 **(J-M)** Confocal images of cultured neurons stained with anti-Synaptophysin antibodies (J) and  
552 quantification of Synaptophysin puncta density (K), intensity (L) and size (M) detected using  
553 automatic two-dimensional segmentation. N (control<sup>RPTP</sup>) = 20 images/3 independent cultures; N  
554 (cTKO<sup>RPTP</sup>) = 21/3. The Synaptophysin confocal data are from the experiments shown in D-I.

555 Data are plotted as mean  $\pm$  SEM and were analyzed using two-way ANOVA tests (F, I,  
556 genotype \*\*\* for PTP $\delta$ ), t-tests (E, L, M) or Mann-Whitney rank sum tests (H, K). \*\*  $p < 0.01$ , \*\*\*  
557  $p < 0.001$ .

558

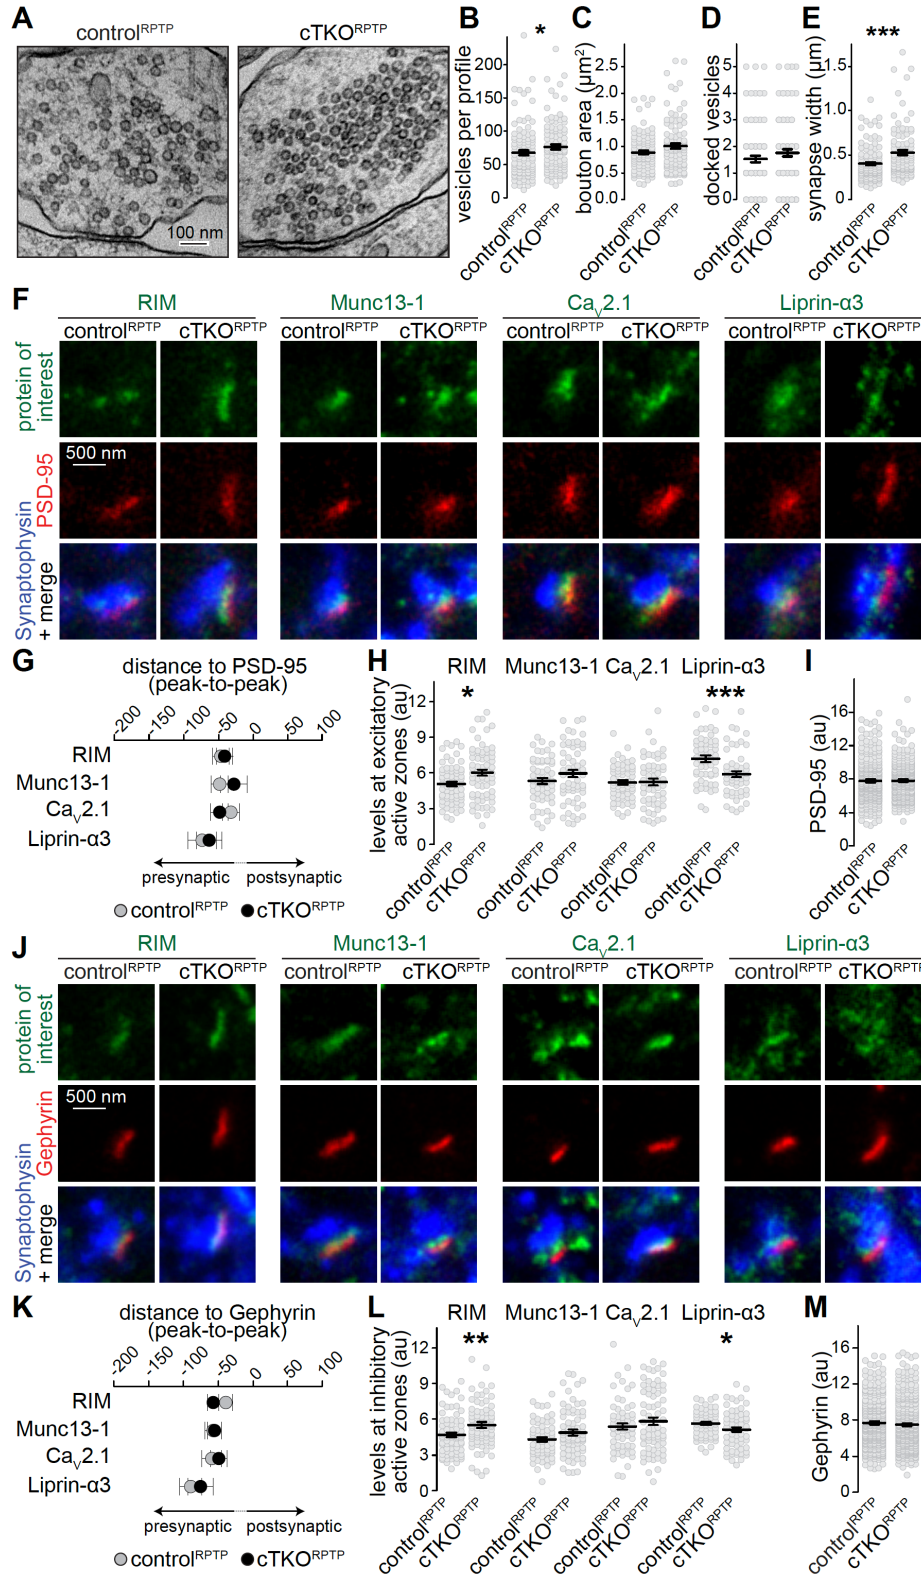

559

560

**Figure 2. Synapse ultrastructure and active zone composition after LAR-RPTP knockout**

561

**(A-E)** Electron micrographs (A) and quantification of the total number of vesicles per profile (B),

562 bouton area (C), number of docked vesicles (D) and synapse width (E) assessed in single  
563 sections of high-pressure frozen neurons. N (control<sup>RPTP</sup>) = 106 synapses/2 independent  
564 cultures, N (cTKO<sup>RPTP</sup>) = 101/2.

565 **(F-H)** STED example images of excitatory side-view synapses (F) and quantification of the  
566 distance to PSD-95 (G) and peak intensities (H) of RIM, Munc13-1, Cav2.1 and Liprin- $\alpha$ 3. RIM:  
567 N (control<sup>RPTP</sup>) = 68 synapses/3 independent cultures, N (cTKO<sup>RPTP</sup>) = 68/3; Munc13-1: N  
568 (control<sup>RPTP</sup>) = 57/3, N (cTKO<sup>RPTP</sup>) = 60/3; Cav2.1: N (control<sup>RPTP</sup>) = 64/3, N (cTKO<sup>RPTP</sup>) = 58/3;  
569 Liprin- $\alpha$ 3: N (control<sup>RPTP</sup>) = 56/3, N (cTKO<sup>RPTP</sup>) = 53/3.

570 **(I)** Quantification of the peak intensity of PSD-95. N (control<sup>RPTP</sup>) = 295/3; N (cTKO<sup>RPTP</sup>) = 293/3.

571 **(J-L)** Same as F-H, but for Gephyrin-containing inhibitory synapses. RIM: N (control<sup>RPTP</sup>) = 75/3  
572 cultures, N (cTKO<sup>RPTP</sup>) = 79/3; Munc13-1: N (control<sup>RPTP</sup>) = 65/3, N (cTKO<sup>RPTP</sup>) = 72/3; Cav2.1:  
573 N (control<sup>RPTP</sup>) = 64/3, N (cTKO<sup>RPTP</sup>) = 71/3; Liprin- $\alpha$ 3: N (control<sup>RPTP</sup>) = 65/3, N (cTKO<sup>RPTP</sup>) =  
574 61/3.

575 **(M)** Quantification of the peak intensity of Gephyrin. N (control<sup>RPTP</sup>) = 327/3; N (cTKO<sup>RPTP</sup>) =  
576 342/3.

577 Data are plotted as mean  $\pm$  SEM and were analyzed using Mann-Whitney rank sum tests. \*  $p <$   
578 0.05, \*\*  $p < 0.01$ , \*\*\*  $p < 0.001$ .

579



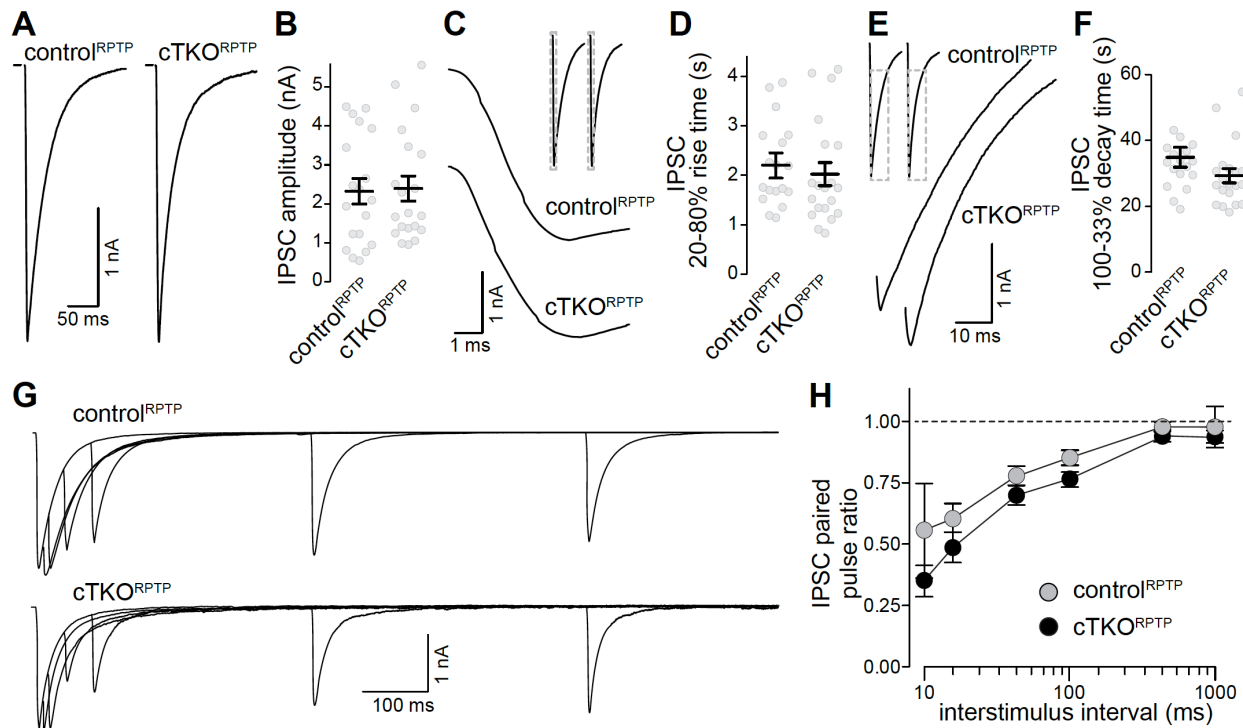

580

581 **Figure 3. Synaptic transmission in LAR-RPTP triple knockout neurons**

582 **(A, B)** Example traces (A) and average amplitudes (B) of single action potential evoked IPSCs.

583 N (control<sup>RPTP</sup>) = 19 cells/3 independent cultures, N (cTKO<sup>RPTP</sup>) = 20/3.

584 **(C, D)** Example zoomed-in trace of the IPSC rise (C) and quantification of 20-80% rise times (D)

585 of evoked IPSCs, N as in A, B.

586 **(E, F)** Example zoomed-in trace of the IPSC decay (E) and quantification of 100-33% decay

587 times (F) of evoked IPSCs. N as in A, B.

588 **(G, H)** Example traces (G) and average IPSC paired pulse ratios (H) at various interstimulus

589 intervals. N (control<sup>RPTP</sup>) = 18/3, N (cTKO<sup>RPTP</sup>) = 19/3.

590 Data are plotted as mean  $\pm$  SEM and were analyzed using Mann-Whitney rank sum tests (B, D,

591 F) or a two-Way ANOVA (H), no significant differences were detected.

592

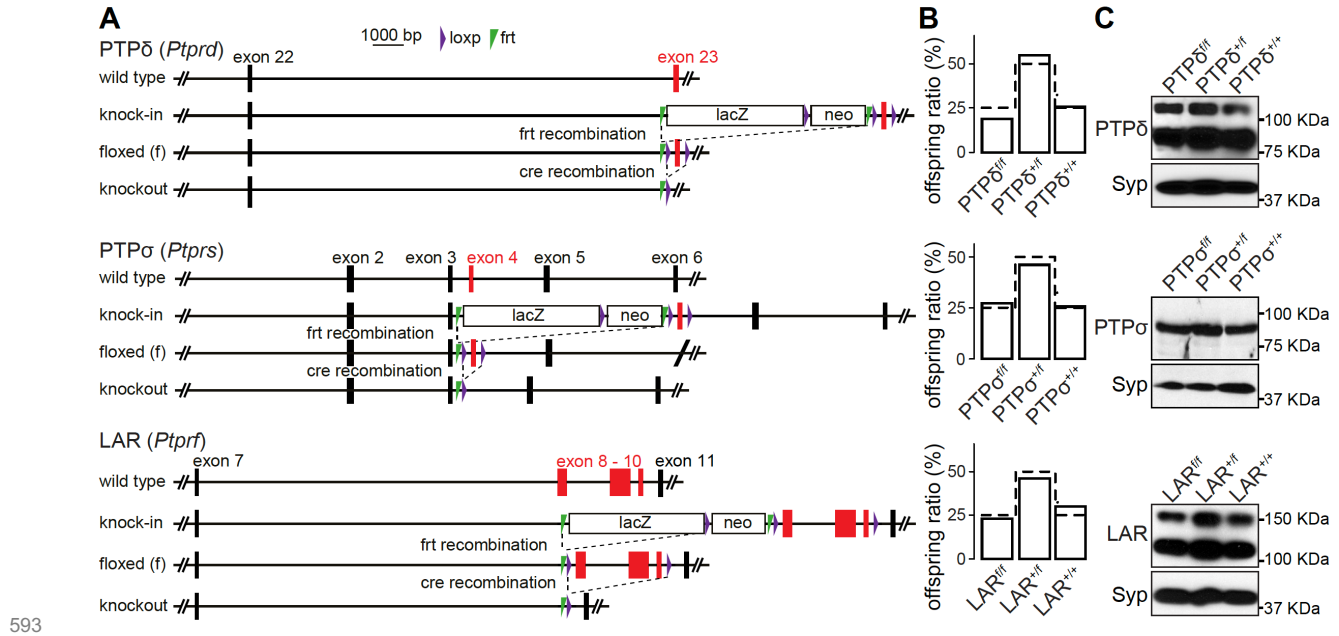

593

594 **Figure S1. Generation of LAR-RTP conditional knockout mice**

595 **(A)** Gene targeting strategies for LAR-RTP knockout mice. PTP $\delta$  and PTP $\sigma$  alleles contain  
 596 loxP sites flanking exons 23 and 4, respectively. They were imported for cryo-recovery at the  
 597 “knock-in” stage from the Wellcome Trust Sanger Institute (*Ptprd*<sup>tm2a(KOMP)Wtsi</sup>), and the Canadian  
 598 Mouse Mutant Repository at the Hospital for Sick Children (C57BL/6N-*Ptprs*<sup>tm1a(KOMP)Mbp/Tcp</sup>),  
 599 and are identical to the alleles described before (Bunin et al., 2015; Farhy-Tselnicker et al.,  
 600 2017; Sclip and Südhof, 2020). The LAR allele contains loxp sites flanking exons 8, 9 and 10  
 601 and was obtained at the embryonic stem cell stage from the Helmholtz Zentrum München  
 602 (*Ptprf*<sup>tm1a(EUCOMM)Wtsi</sup>). All three lines were crossed to flp-transgenic mice (Dymecki, 1996) to  
 603 generate “floxed” conditional knockout alleles.

604 **(B)** Survival analyses were performed on the offspring of heterozygote matings for each  
 605 individual allele. Offspring ratios were assessed at >P14. Bars show the percentage of offspring  
 606 for each genotype, and dotted lines represent the expected Mendelian ratio. N (PTP $\delta$ ) = 28  
 607 mice/4 litters; N (PTP $\sigma$ ) = 31/4; N (LAR) = 22/3. Chi-square tests were used to compare  
 608 expected Mendelian ratios with obtained offspring ratios, and no statistical difference was  
 609 detected.

610 **(C)** Western blots of whole brain homogenates of wild type, heterozygous and homozygous  
611 littermate mice for the PTP $\delta$ , PTP $\sigma$  and LAR floxed alleles. For PTP $\delta$ , ~ 80 kDa and ~120 kDa  
612 bands were detected, matching the cleaved extracellular domains of the two main isoforms  
613 expressed in the brain containing 3 immunoglobulin and either 4 or 8 fibronectin domains  
614 (Shishikura et al., 2016). For PTP $\sigma$ , a single band at ~ 90 kDa was detected, matching the size  
615 of the catalytically cleaved extracellular domain of the short isoform containing 4 fibronectin  
616 domains and 3 immunoglobulin domains (Aicher et al., 1997). For LAR, ~110 kDa and ~150  
617 kDa bands were detected as previously described in the hippocampus (Yang et al., 2003). The  
618 bigger band matches the cleaved extracellular domains of the longest isoform containing 3  
619 immunoglobulin and 8 fibronectin domains (Aicher et al., 1997), while the smaller band likely  
620 corresponds to a shorter isoform. In cultured hippocampal neurons, only the higher intensity  
621 bands at the lower molecular weight were detected, and these bands were effectively removed  
622 after cre-recombination of the floxed alleles (Fig. 1B).

623

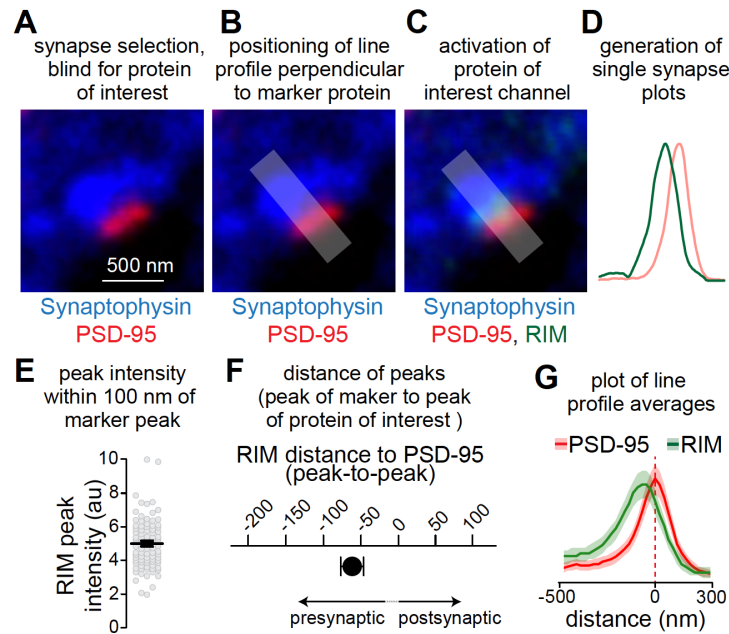

624

## 625 **Figure S2. STED analysis workflow**

626 **(A-D)** Workflow for STED analyses, showing an example of a side-view synapse

627 immunostained for PSD-95 and RIM (both in STED mode) and Synaptophysin (in confocal

628 mode). Side-view synapses are included when a PSD-95 bar is present at the edge of a

629 Synaptophysin-labeled vesicle cloud (A). The synapse selection process is conducted by an

630 experimenter blind for the protein of interest (RIM in the example shown). Next, a line profile is

631 generated perpendicular to PSD-95 (B). The area for generating the line profile is shaded. The

632 protein of interest channel is then activated (C) and the line profiles are generated (D).

633 **(E-G)** Outline of the quantitative analyses across synapses. The peak intensity of the protein of

634 interest within 100 nm of PSD-95 (Wong et al., 2018) is used to estimate protein levels in the

635 synaptic cleft or at the active zone (E). The distance between RIM and PSD-95 peaks is used to

636 estimate protein localization (F). The average of the line profiles of all synapses within an

637 experiment is used to illustrate protein distribution (G). Data to illustrate STED workflow are

638 from wild type hippocampal cultures, N = 42 synapses/2 independent cultures.

639 Data are plotted as mean  $\pm$  SEM.

640

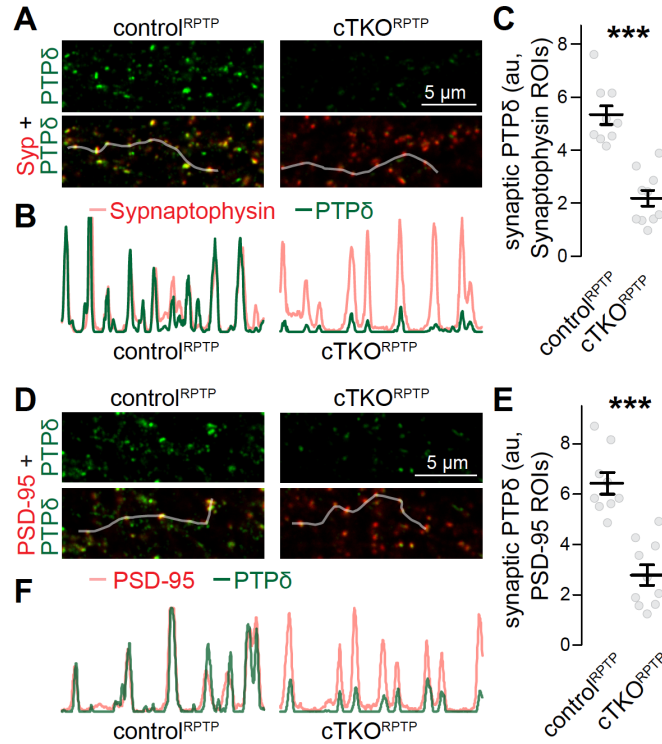

641

### 642 **Figure S3. Confocal analyses of PTPδ**

643 **(A-C)** Sample confocal images (A), sample intensity profiles (B) and quantification (C) of PTPδ

644 at synapses identified by Synaptophysin (Syp) staining. Intensity profiles of PTPδ and

645 Synaptophysin (C) along the shaded lines highlighted in A show good correlation between the

646 signals. In C, PTPδ fluorescence intensities were quantified in Synaptophysin regions of interest

647 (ROIs). The confocal images analyzed here were acquired in the same imaging session and for

648 the same image frames as the STED analyses shown in Fig. 1. Confocal images were always

649 acquired prior to STED acquisition, N (control<sup>RPTP</sup>) = 9 images/3 independent cultures; N

650 (cTKO<sup>RPTP</sup>) = 10/3.

651 **(D-F)** Same as A-C, but for PSD-95 ROIs. To avoid potential confounds of mildly increased

652 Synaptophysin areas (Fig. 1M), we repeated the confocal analyses generating PSD-95 instead

653 of Synaptophysin ROIs. In diffraction-limited microscopy, the resolution is insufficient to

654 distinguish pre- and postsynaptic markers, and either marker can be used to generate synapse

655 ROIs. N as in C.

656 Data are plotted as mean  $\pm$  SEM and analyzed using Mann-Whitney rank sum tests, \*\*\*  $p <$   
657 0.001.

658

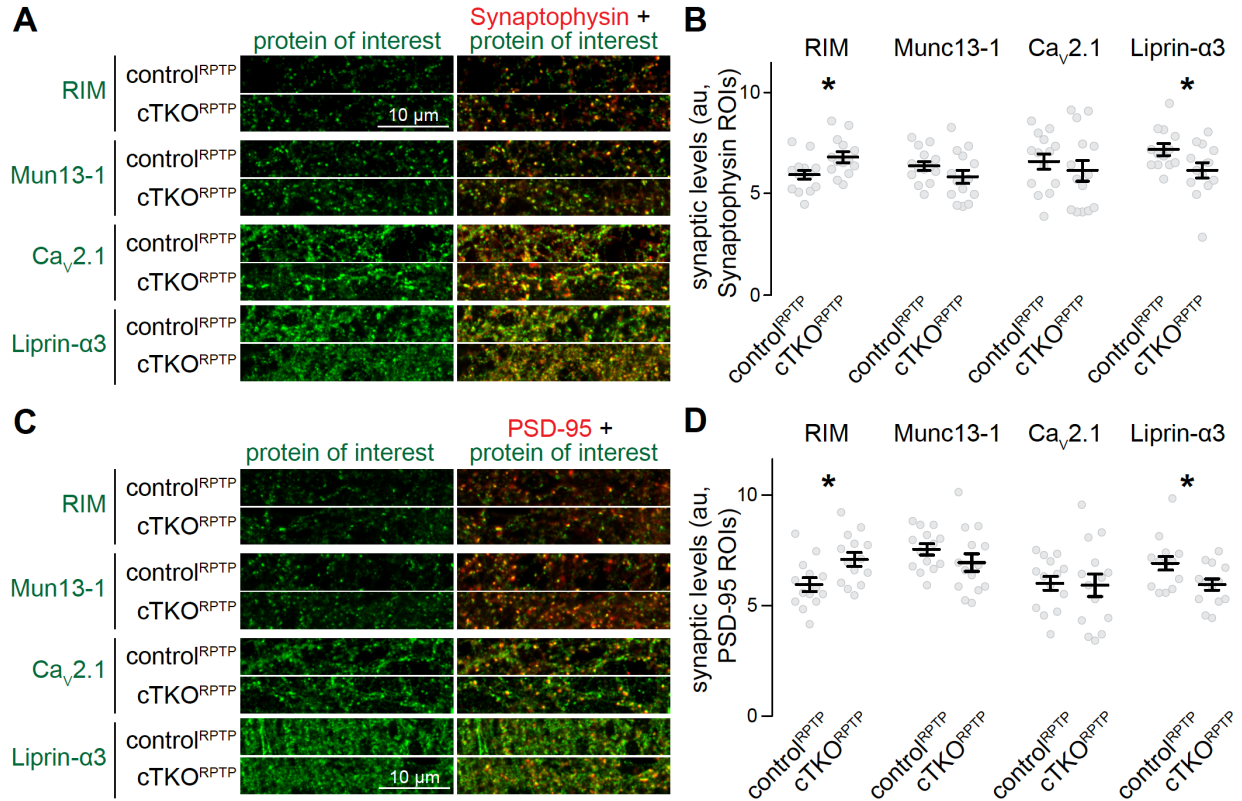

659

660 **Figure S4. Confocal analyses of synaptic protein levels after ablation of LAR-RPTPs**

661 **(A, B)** Example confocal images (A) and quantification (B) of the intensities of RIM, Munc13-1,

662 Ca<sub>v</sub>2.1 and Liprin-α3 within Synaptophysin ROIs. The confocal images analyzed here were

663 acquired in the same imaging session and for the same image frames as the STED analyses

664 shown in Fig. 2. Confocal images were always acquired prior to STED acquisition, RIM: N

665 (control<sup>RPTP</sup>) = 14 images/3 independent cultures, N (cTKO<sup>RPTP</sup>) = 14/3; Munc13-1: N

666 (control<sup>RPTP</sup>) = 14/3, N (cTKO<sup>RPTP</sup>) = 14/3; Ca<sub>v</sub>2.1: N (control<sup>RPTP</sup>) = 14/3, N (cTKO<sup>RPTP</sup>) = 14/3;

667 Liprin-α3: N (control<sup>RPTP</sup>) = 13/3, N (cTKO<sup>RPTP</sup>) = 13/3.

668 **(C, D)** Same as A and B, but for PSD-95 ROIs. To avoid potential confounds of mildly increased

669 Synaptophysin areas (Fig. 1M), we repeated the confocal analysis generating PSD-95 instead

670 of Synaptophysin ROIs. In diffraction-limited microscopy, the resolution is insufficient to

671 distinguish pre- and postsynaptic markers, and either marker can be used to generate synapse

672 ROIs. N as in B.

673 Data are plotted as mean  $\pm$  SEM and were analyzed using t-tests, except for Cav2.1 in B where  
674 a Mann-Whitney rank sum test was used. \*  $p < 0.05$ .
